# Supplementary material
Source: publisher site journal article supplement (https://www.spandidos-publications.com/5739/downloadSupplementary)
Supplement: Supplementary file 1 [file downloadSupplementary]

## Sheet: Sheet1
Table SIII. Core genes extracted from the GSE58486 and GSE160516 datasets.
GSE58486	GSE160516
Hmox1	Il6
Il1b	Hmox1
Cybb	Il33
Capg	Il1b
Cd44	Ncf2
Ptgs2	Psat1
Il33	Slc7a5
Asns	Cdca3
Hells	Ptgs2
Slc7a5	Cd44
Panx1	Capg
Psat1	Sting1
Il6	Panx1
Tgfbr1	Atf3
Cdkn1a	Cxcl2
Gria3	Arntl
Egfr	Cgas
G6pdx	Cdkn1a
Tgfb1	Slc7a11
Sat1	Asns
Arntl	Hells
Hamp	Nox4
Rrm2	Zfp36
Arf6	Hspb1
Cdca3	Ddit4
Pgd	Cybb
Muc1	Sat1
Ripk1	Rrm2
Nox4	Srxn1
Acsl4	Tgfbr1
Pvt1	Gria3
Vdr	G6pdx
Gdf15	Ripk1
Ncf2	Bid
Slc1a4	Nras
Cxcl2	Arf6
P4hb	Abhd12
Hif1a	Slc2a3
Atf3	Pgd
Hspb1	Eif2ak4
Aurka	Slc1a4
Tnfaip3	Lrrfip1
Fads2	Acsl4
Far1	Hamp
Slc7a11	Tgfb1
Fads1	Txnrd1
Srxn1	Nnmt
Plin2	Egfr
Zfp36	Slc1a5
Txnrd1	Gdf15
Pml	Slc2a1
Tlr4	P4hb
Jdp2	Jun
Ints2	Abcc1
Eif2ak4	Ano6
Xbp1	Tlr4
Nnmt	Pml
Nras	Nr5a2
Slc3a2	Far1
Ctsb	Zfas1
Src	Aurka
Ano6	Sesn2
Lrrfip1	Hilpda
Cd82	Fads1
Atf4	Selenos
Atg7	Muc1
Abcc1	Slc3a2
Bid	Atf4
Angptl7	Xbp1
Srebf2	Jdp2
Snora16a	Slc2a6
Slc2a1	Suv39h1
Fancd2	Tube1
Hsd17b11	Gabarapl1
Acsl3	Gabpb1
Mapk3	Fads2
Osbpl9	Hif1a
Slc39a14	Tnfaip3
Slc2a3	Tbk1
Tube1	Slc11a2
Stat3	Plin2
Snx4	Stmn1
Mtdh	Mmp13
Cdh1	Cdo1
Agps
Prkaa1
Sesn2
